# Supplementary material for: Sensitized EuIII luminescence through energy transfer from PtM2 (M = Ag or Au) alkynyl chromophores in PtM2Eu2 heteropentanuclear complexes
Source: Royal Society of Chemistry journal article supplement (doi:10.1039/c3tc30474d), 2013-01-01
Supplement: c3tc30474d.pdf [file c3tc30474d.pdf]

# Electronic Supporting Information

## Sensitized Eu<sup>III</sup> Luminescence through Energy Transfer from PtM<sub>2</sub> (M = Ag or Au) Alkynyl Chromophore in PtM<sub>2</sub>Eu<sub>2</sub> Heteropentanuclear Complexes

Jia Li,<sup>a,c</sup> Jin-Yun Wang<sup>a</sup> and Zhong-Ning Chen<sup>\*a,b</sup>

<sup>a</sup> *State Key Laboratory of Structural Chemistry, Fujian Institute of Research on the Structure of Matter, Chinese Academy of Sciences, Fuzhou, Fujian 350002, China*

<sup>b</sup> *State Key Laboratory of Organometallic Chemistry, Shanghai Institute of Organic Chemistry, Chinese Academy of Sciences, Shanghai 200032, China*

<sup>c</sup> *Graduate University of Chinese Academy of Sciences, Beijing, 100039, China*

**Table S1.** Crystallographic Data for **1Eu·2Et<sub>2</sub>O** and **2Eu·4Et<sub>2</sub>O**.

|                                                        | <b>1Eu·2Et<sub>2</sub>O</b>                                                                                                                        | <b>2Eu·4Et<sub>2</sub>O</b>                                                                                                                        |
|--------------------------------------------------------|----------------------------------------------------------------------------------------------------------------------------------------------------|----------------------------------------------------------------------------------------------------------------------------------------------------|
| empirical formula                                      | C <sub>148</sub> H <sub>112</sub> Ag <sub>2</sub> Cl <sub>2</sub> Eu <sub>2</sub> F <sub>36</sub> N <sub>6</sub> O <sub>22</sub> P <sub>6</sub> Pt | C <sub>156</sub> H <sub>132</sub> Au <sub>2</sub> Cl <sub>2</sub> Eu <sub>2</sub> F <sub>36</sub> N <sub>6</sub> O <sub>24</sub> P <sub>6</sub> Pt |
| formula weight                                         | 3981.91                                                                                                                                            | 4308.34                                                                                                                                            |
| crystal system                                         | Triclinic                                                                                                                                          | Triclinic                                                                                                                                          |
| space group                                            | <i>P</i> $\bar{1}$                                                                                                                                 | <i>P</i> $\bar{1}$                                                                                                                                 |
| <i>a</i> , Å                                           | 15.030(4)                                                                                                                                          | 12.3652(1)                                                                                                                                         |
| <i>b</i> , Å                                           | 15.677(4)                                                                                                                                          | 16.9603(2)                                                                                                                                         |
| <i>c</i> , Å                                           | 19.167(4)                                                                                                                                          | 26.9859(2)                                                                                                                                         |
| $\alpha$ , °                                           | 91.365(3)                                                                                                                                          | 106.747(7)                                                                                                                                         |
| $\beta$ , °                                            | 93.191(3)                                                                                                                                          | 95.282(12)                                                                                                                                         |
| $\gamma$ , °                                           | 106.915(3)                                                                                                                                         | 101.088(8)                                                                                                                                         |
| <i>V</i> , Å <sup>3</sup>                              | 4310.2(17)                                                                                                                                         | 5252.32(4)                                                                                                                                         |
| <i>Z</i>                                               | 1                                                                                                                                                  | 1                                                                                                                                                  |
| <i>r</i> <sub>calcd</sub> g/cm <sup>-3</sup>           | 1.534                                                                                                                                              | 1.362                                                                                                                                              |
| <i>m</i> , mm <sup>-1</sup>                            | 1.935                                                                                                                                              | 2.8                                                                                                                                                |
| radiation ( <i>l</i> , Å)                              | 0.71073                                                                                                                                            | 0.71073                                                                                                                                            |
| temp, (K)                                              | 293(2)                                                                                                                                             | 293(2)                                                                                                                                             |
| R1( <i>F</i> <sub>o</sub> ) <sup>a</sup>               | 0.0592                                                                                                                                             | 0.057                                                                                                                                              |
| wR2( <i>F</i> <sub>o</sub> <sup>2</sup> ) <sup>b</sup> | 0.1701                                                                                                                                             | 0.1509                                                                                                                                             |
| GOF                                                    | 1.064                                                                                                                                              | 1.006                                                                                                                                              |

<sup>a</sup> R1 =  $\Sigma|F_o - F_c|/\Sigma F_o$     <sup>b</sup> wR2 =  $\Sigma[w(F_o^2 - F_c^2)^2]/\Sigma[w(F_o^2)]^{1/2}$

**Table S2.** Selected Bond Distances (Å) and Angles (°) of **1Eu·2Et<sub>2</sub>O** and **2Eu·4Et<sub>2</sub>O**.

| <b>1Eu·2Et<sub>2</sub>O</b> |            | <b>2Eu·4Et<sub>2</sub>O</b> |            |
|-----------------------------|------------|-----------------------------|------------|
| Pt1-C33                     | 2.005(6)   | Pt1-C32                     | 2.035(7)   |
| Pt1-P2                      | 2.3260(19) | Pt1-P2                      | 2.3097(16) |
| Pt1-Ag1                     | 2.9291(8)  | Pt1-Au1                     | 2.9504(3)  |
| Ag1-P1                      | 2.409(2)   | Au1-P1                      | 2.3084(18) |
| Ag1-P3                      | 2.402(2)   | Au1-P3                      | 2.3176(17) |
| Eu1-O1                      | 2.452(6)   | Eu1-O1                      | 2.444(7)   |
| Eu1-O2                      | 2.489(6)   | Eu1-O2                      | 2.398(9)   |
| Eu1-O3                      | 2.396(6)   | Eu1-O3                      | 2.358(8)   |
| Eu1-O4                      | 2.381(6)   | Eu1-O4                      | 2.350(8)   |
| Eu1-O5                      | 2.449(6)   | Eu1-O5                      | 2.416(7)   |
| Eu1-O6                      | 2.390(7)   | Eu1-O6                      | 2.466(9)   |
| Eu1-N1                      | 2.574(7)   | Eu1-N1                      | 2.565(6)   |
| Eu1-N2                      | 2.564(5)   | Eu1-N2                      | 2.533(8)   |
| Eu1-N3                      | 2.540(8)   | Eu1-N3                      | 2.558(9)   |
| P1-C1                       | 1.837(7)   | P1-C14                      | 1.799(7)   |
| P1-C3                       | 1.804(7)   | P1-C20                      | 1.807(7)   |
| P1-C9                       | 1.801(8)   | P1-C66                      | 1.840(6)   |
| P2-C1                       | 1.827(7)   | P2-C26                      | 1.801(7)   |
| P2-C2                       | 1.831(7)   | P2-C66                      | 1.818(6)   |
| P2-C15                      | 1.821(8)   | P2-C13A                     | 1.828(6)   |
| P3-C21                      | 1.801(8)   | P3-C1                       | 1.810(7)   |
| P3-C27                      | 1.824(9)   | P3-C7                       | 1.782(8)   |
| P3-C2A                      | 1.842(7)   | P3-C13                      | 1.810(6)   |
|                             |            |                             |            |
| C34-C33-Pt1                 | 178.0(7)   | C33-C32-Pt1                 | 176.1(5)   |
| C1-P2-Pt1                   | 113.9(2)   | C26-P2-Pt1                  | 121.3(2)   |
| C2-P2-Pt1                   | 109.8(3)   | C66-P2-Pt1                  | 107.3(2)   |
| C15-P2-Pt1                  | 120.5(3)   | C13A-P2-Pt1                 | 113.2(2)   |
| P1-Ag1-Pt1                  | 95.37(5)   | P1-Au1-Pt1                  | 90.04(4)   |
| P3-Ag1-Pt1                  | 90.54(5)   | P3-Au1-Pt1                  | 94.43(4)   |
| C33A-Pt1-C33                | 180.000(1) | C32A-Pt1-C32                | 180.000(2) |
| P2-Pt1-P2A                  | 180.000(1) | P2-Pt1-P2A                  | 180.000(2) |
| C33-Pt1-P2                  | 85.8(2)    | C32-Pt1-P2                  | 84.52(17)  |
| C33A-Pt1-P2                 | 94.2(2)    | C32-Pt1-P2A                 | 95.48(17)  |
| C33A-Pt1-Ag1                | 105.8(2)   | C32A-Pt1-Au1                | 74.29(15)  |
| C33-Pt1-Ag1                 | 74.2(2)    | C32-Pt1-Au1                 | 105.71(15) |
| P2-Pt1-Ag1                  | 87.10(5)   | P2-Pt1-Au1                  | 92.39(4)   |
| P2A-Pt1-Ag1                 | 92.90(5)   | P2A-Pt1-Au1                 | 87.61(4)   |
| P3-Ag1-P1                   | 172.26(7)  | P1-Au1-P3                   | 175.40(6)  |

**Table S3.** The Molecular Orbital Compositions (%) by SCPA Approach (C-squared Population Analysis Proposed by Ros and Schuit) and the Absorption and Emission Transitions for Complex **1** in CH<sub>2</sub>Cl<sub>2</sub> Solution Calculated by TD-DFT Method at the PBE1PBE Level.

| orbital | energy<br>(eV) | MO contribution (%) |                  |       |                                      |
|---------|----------------|---------------------|------------------|-------|--------------------------------------|
|         |                | Pt (s/p/d)          | Ag (s/p/d)       | dpmp  | C≡CC <sub>6</sub> H <sub>4</sub> tpy |
| LUMO+2  | -1.82          | 3.55 (0/99/0)       | 7.89 (24/73/2)   | 27.51 | 61.05                                |
| LUMO+1  | -1.94          | 2.92 (1/0/99)       | 3.45 (21/76/2)   | 7.92  | 85.71                                |
| LUMO    | -2.73          | 16.86 (0/99/0)      | 11.10 (12/72/16) | 36.03 | 36.01                                |
| HOMO    | -6.52          | 19.08 (5/0/95)      | 4.51 (5/39/56)   | 5.09  | 71.31                                |
| HOMO-1  | -6.92          | 0.77 (0/90/3)       | 12.41 (12/20/68) | 16.45 | 70.37                                |
| HOMO-4  | -7.22          | 26.95 (8/0/92)      | 28.53 (22/7/71)  | 41.83 | 2.68                                 |
| HOMO-5  | -7.4           | 19.31 (1/0/99)      | 1.71 (9/34/56)   | 27.13 | 51.85                                |

| states         | <i>E</i> /nm<br>(eV) | O.S.   | component     | CI coef. | assignment                                                             | measured<br>(nm) |
|----------------|----------------------|--------|---------------|----------|------------------------------------------------------------------------|------------------|
| T <sub>1</sub> | 504.9<br>(2.46)      | 0.0000 | HOMO→LUMO     | 0.64820  | <sup>3</sup> IL/ <sup>3</sup> LLCT/ <sup>3</sup> MC                    | 516.5            |
|                |                      |        | HOMO-1→LUMO+1 | 0.25845  | <sup>1</sup> IL/ <sup>1</sup> LLCT                                     |                  |
| S <sub>1</sub> | 408.5<br>(3.03)      | 0.9882 | HOMO→LUMO     | 0.68132  | <sup>1</sup> IL/ <sup>1</sup> LLCT/ <sup>1</sup> MC                    | 396.8            |
| S <sub>4</sub> | 336.5<br>(3.68)      | 0.5527 | HOMO-4→LUMO   | 0.61100  | <sup>1</sup> IL/ <sup>1</sup> MC/ <sup>1</sup> MLCT                    | 318              |
|                |                      |        | HOMO-5→LUMO   | -0.27952 | <sup>1</sup> IL/ <sup>1</sup> MC/ <sup>1</sup> LLCT                    |                  |
| S <sub>9</sub> | 305.3<br>(4.06)      | 1.2745 | HOMO→LUMO+2   | 0.63319  | <sup>1</sup> IL/ <sup>1</sup> MLCT/ <sup>1</sup> MC/ <sup>1</sup> LLCT | 278.8            |
|                |                      |        | HOMO-1→LUMO+1 | 0.21187  | <sup>1</sup> IL/ <sup>1</sup> LLCT                                     |                  |

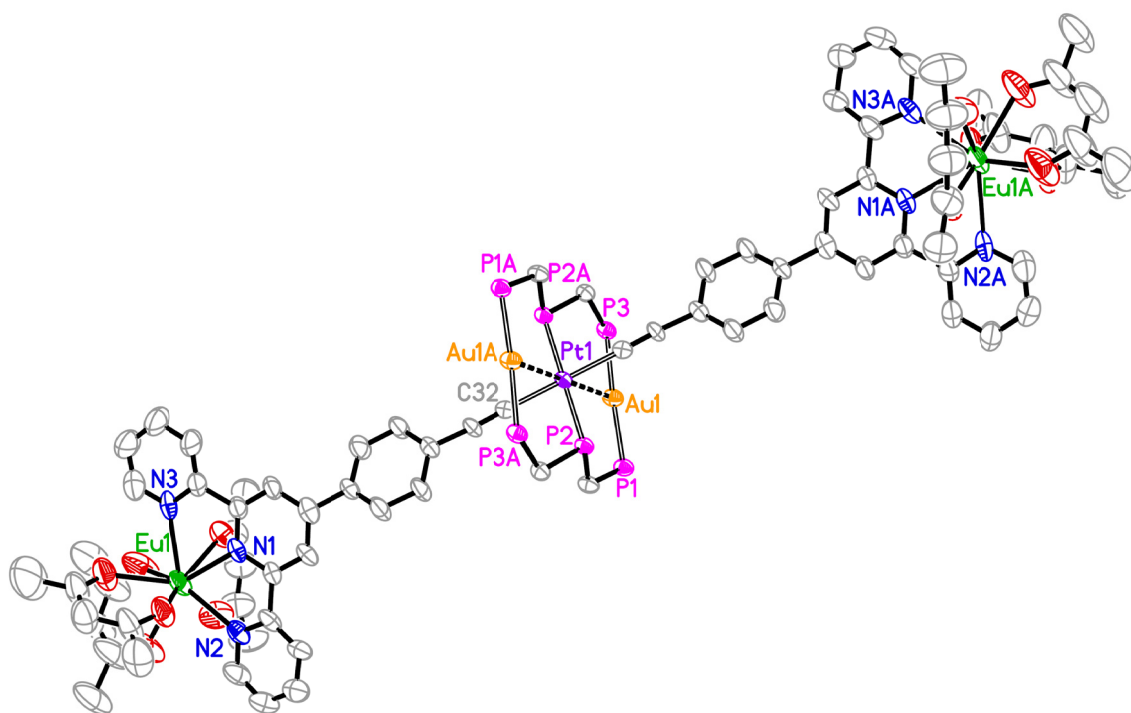

**Figure S1.** ORTEP drawing (30% thermal ellipsoid) of **2Eu**. The F atoms on the trifluoromethyl are omitted for clarity.

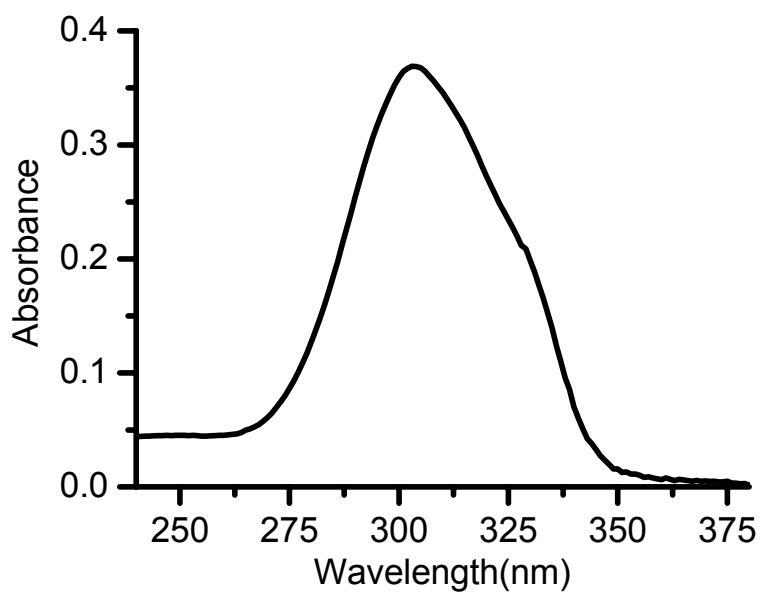

**Figure S2.** UV-vis electronic absorption spectrum of  $\text{Eu}(\text{hfac})_3(\text{H}_2\text{O})_2$  in dichloromethane solution at 298 K.

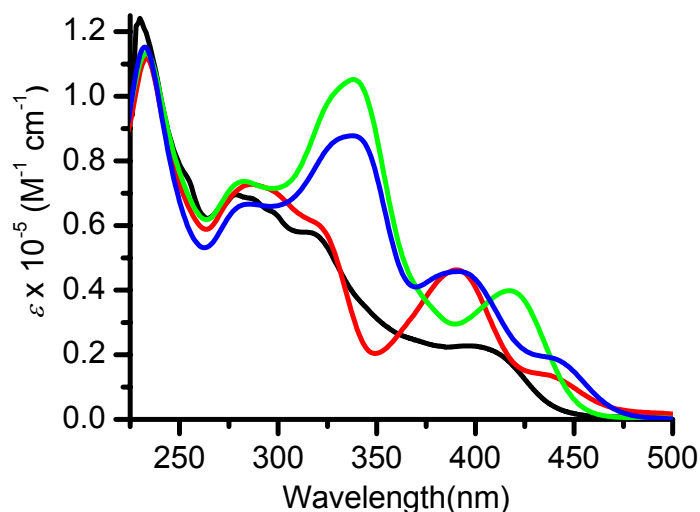

**Figure S3.** UV-vis electronic absorption spectra of complexes **1** (black), **2** (red), **3** (green) and **4** (blue) in dichloromethane solutions at 298K.

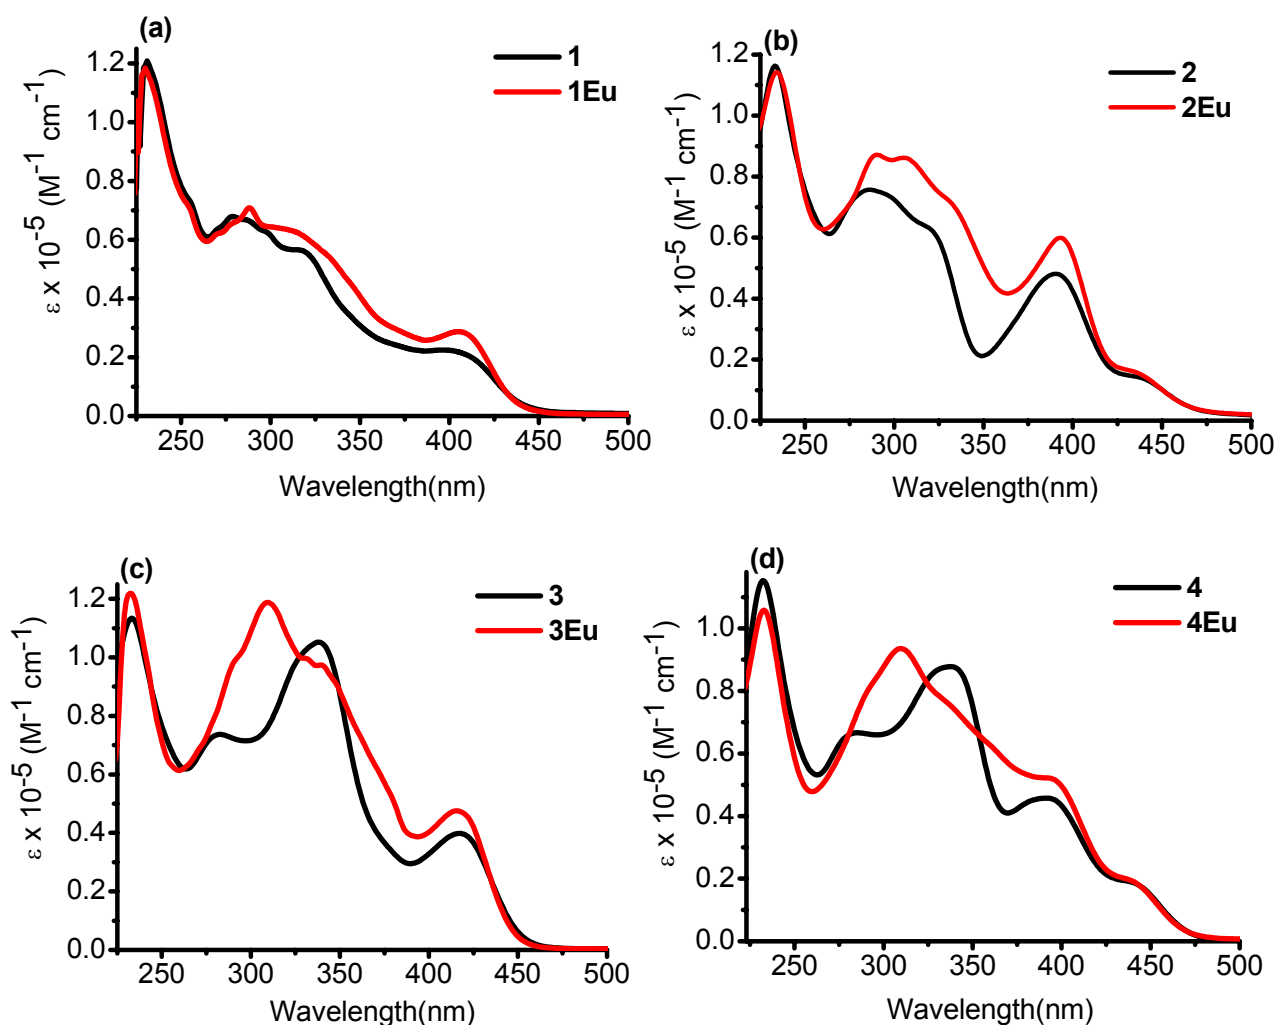

**Figure S4.** UV-vis electronic absorption spectra of complexes **1** and **1Eu** (a), **2** and **2Eu** (b), **3** and **3Eu** (c), and **4** and **4Eu** (d).

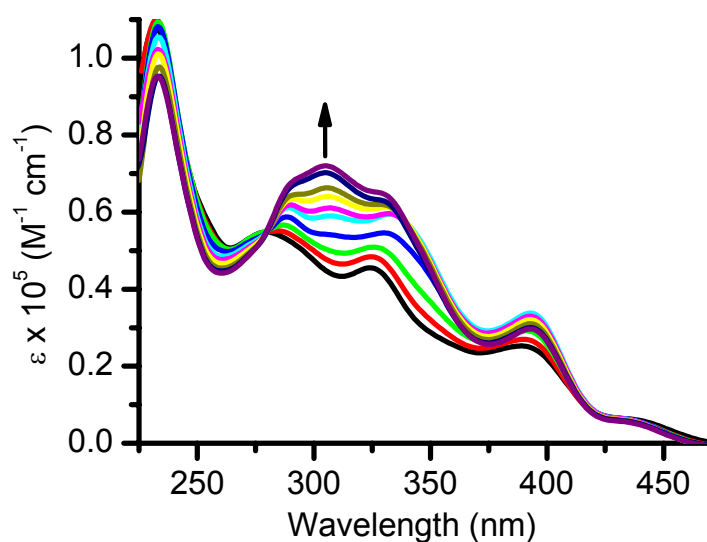

**Figure S5.** Changes in the UV-vis absorption spectra by titration of  $1 \times 10^{-5} \text{ M}$  **2** with  $\text{Eu}(\text{hfac})_3(\text{H}_2\text{O})_2$  in dichloromethane solution at 298 K.

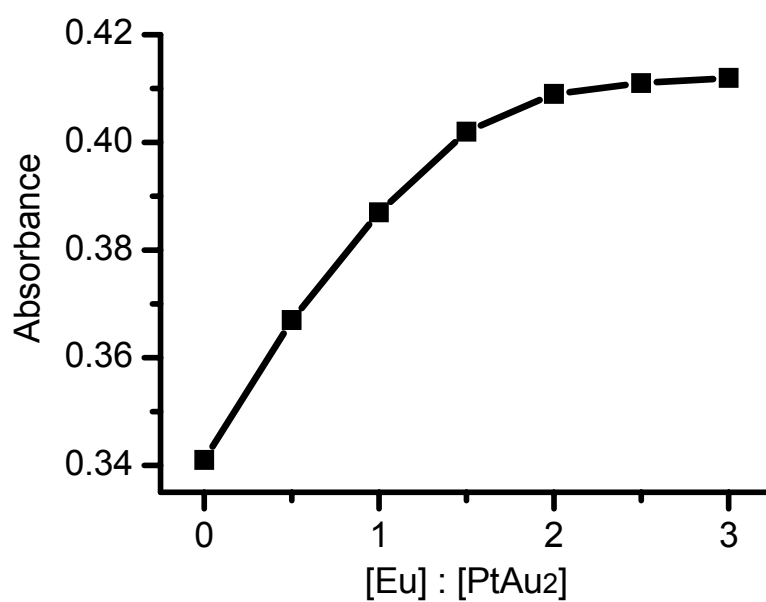

**Figure S6.** Changes of the absorbance at 380 nm versus the ratio of  $\text{Eu}$  to  $\text{PtAu}_2$  moiety by the titration of  $0.74 \times 10^{-5} \text{ M}$  **4** with  $\text{Eu}(\text{hfac})_3(\text{H}_2\text{O})_2$  in dichloromethane at 298 K due to the formation of complex **4Eu**.

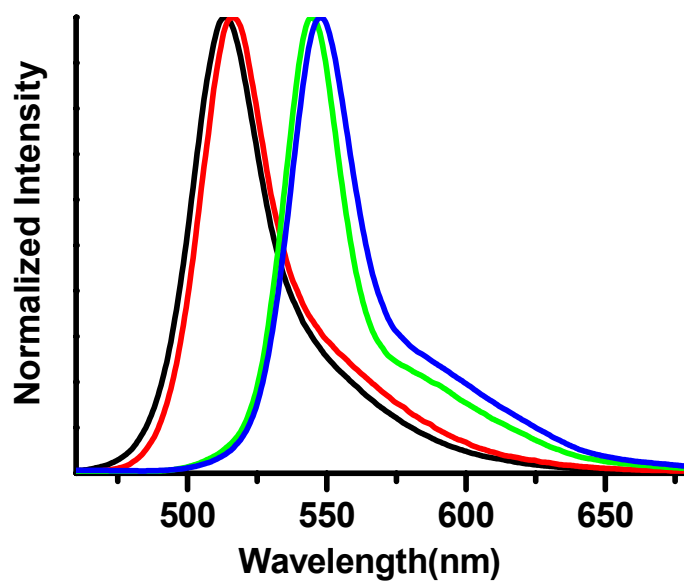

**Figure S7.** Emission spectra of **1** (black), **2** (red), **3** (green), and **4** (blue) in dichloromethane solutions at 298 K.



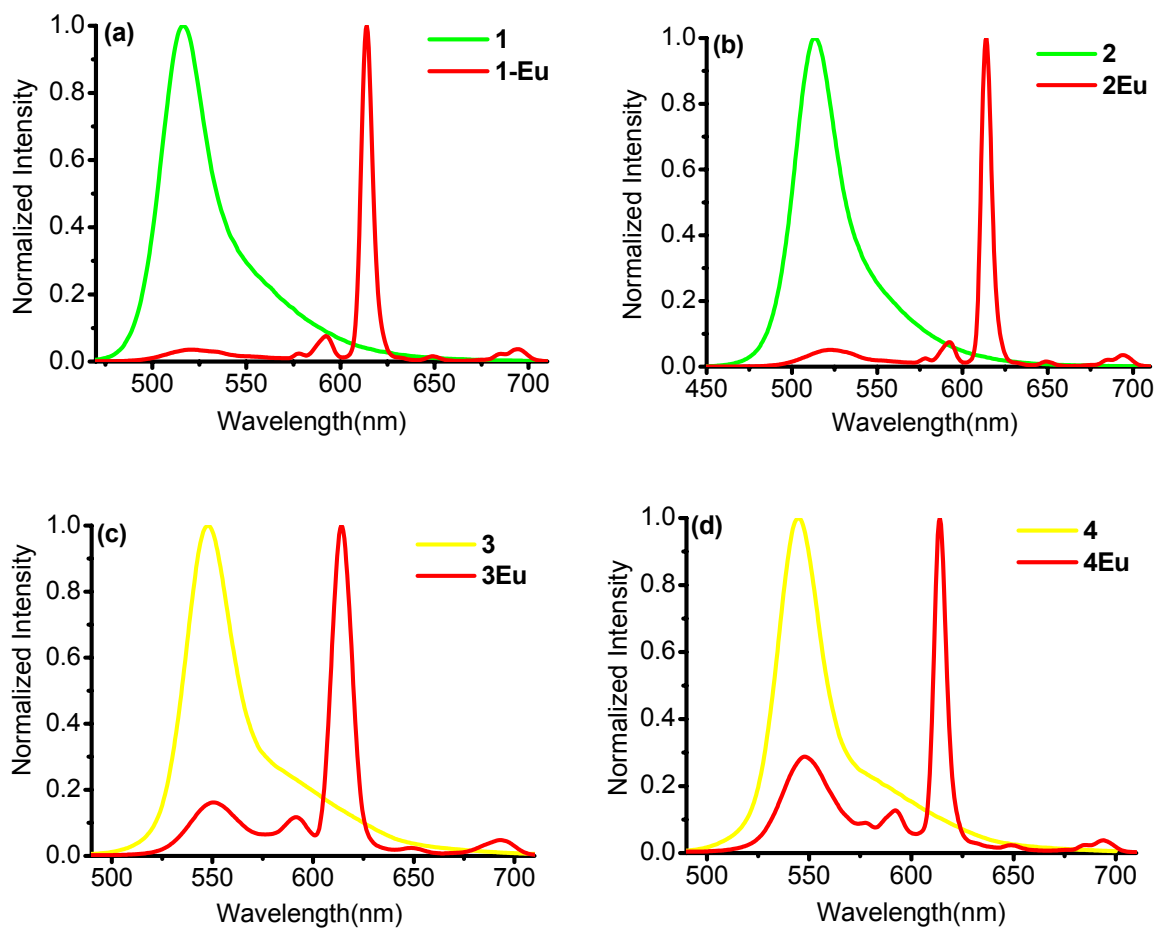

**Figure S8.** Emission spectra of complexes **1** and **1Eu** (a); **2** and **2Eu** (b); **3** and **3Eu** (c), and **4** and **4Eu** (d).

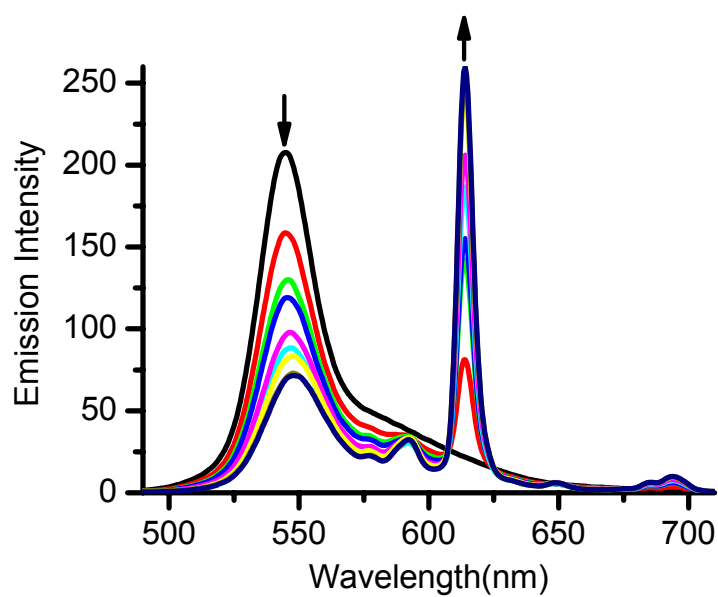

**Figure S9.** Titration of  $0.74 \times 10^{-5}$  M **4** with  $\text{Eu}(\text{hfac})_3(\text{H}_2\text{O})_2$  in dichloromethane solution at 298 K upon excitation at 413 nm, showing the quenching of the PtAu<sub>2</sub>-based emission.

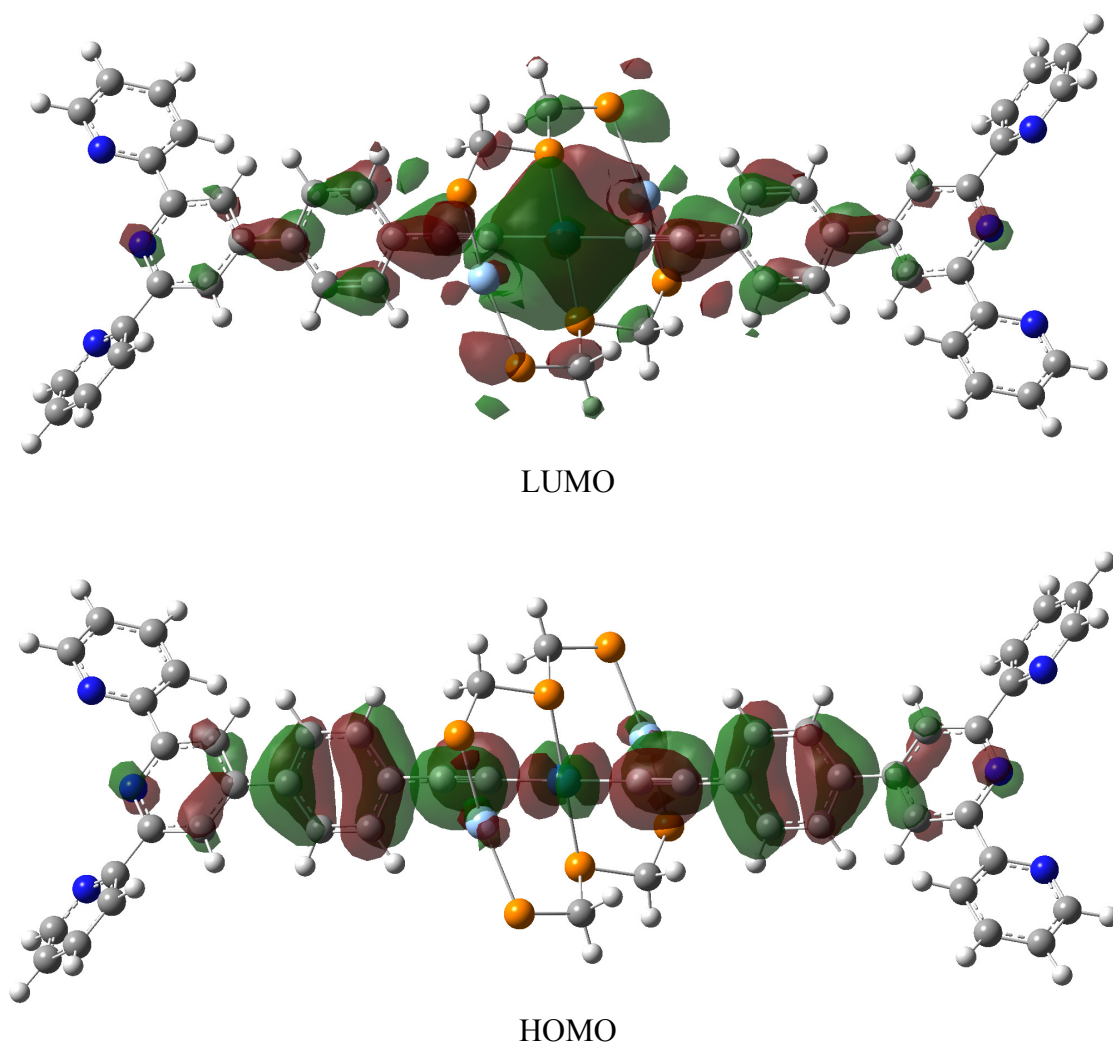

**Figure S10.** Plots of the HOMO and LUMO of complex **1** calculated by TD-DFT method at the PBE1PBE level (isovalue = 0.02). For clarity, the phenyl rings in dpmp are omitted.
